# Supplementary material
Source: publisher figshare collection journal article supplement (https://karger.figshare.com/ndownloader/files/38287992)
Supplement: Supplementary file 1 [file 38287992]

## Sheet: institutions updated
Final #	Authors In Submission	Department	Institution	City	State	Country
101	Felipe Gutierrez Pineda; Hector Alfredo Jaramillo ; Vicente Jaramillo ; Maria Paula Fernandez Gomez ;	Department of Neurosurgery	Hospital San Rafael Angostura	Antioquia		Colombia
102	Ryan McCormack MD, PhD; Nitin Tandon MD FAANS;	Department of Neurosurgery	McGovern Medical School at UT Health	Houston	TX	US
103	Josue Moises Avecillas-Chasin MD PhD; Tommaso Galbiati; Mauro Porta; Domenico Servello;	Department of Neurosurgery	University of Nebraska Medical Center	Omaha	NE	US
104	Muhammad El Shatanofy; Katherine Hofmann; John S. Myseros MD; William Gaillard ; Robert F. Keating MD; Chima Oluigbo;	Department of Neurosurgery	Children's National Medical Center	Washington	D.C.	US
105	Ben Shofty MD; Himanshu Sharma MD, PhD; Ron Gadot ; Huy Dang; Jay R. Gavvala ; Vaishnav Krishnan; Alica Goldman; mostafa Hotait; Piotr Olejniczak; Kimberly Houck; Cristina Trandafir; Daniel J. Curry; Sameer A. Sheth; Irfan Ali;	Department of Neurosurgery	Baylor College of Medicine	Houston	TX	US
106	Carlos Emilio Restrepo MD; Nitin Tandon MD FAANS;	Department of Neurosurgery	Memorial Hermann Hospital, Texas Medical Center	Houston	TX	US
107	W. Jeffrey Elias MD; Shayan Moosa MD; Chang-Chia Liu BS MSc PhD;	Department:Department of Neurological Surgery	Univ. of Virginia Health Systems	Charlottesville	VA	US
108	Yueh-Hsin Lin; Nicholas Bernard Dadario; Lewis Crawford; Hsu-Kang Dow; Onur Tanglay; Isabella Young; Syed Ahsan; Stephane Doyen; Michael Sughrue;	N/A	Omniscient Neurotechnology	Sydney		Australia
109	Cihan Mehmet Kadipasaoglu MD; Nitin Tandon MD FAANS;	Department of Neurosurgery	McGovern Medical School at UT Health	Houston	TX	US
110	Angela Noecker; Jeff Mlaker; Mark Griswold PhD; Cameron C. McIntyre PhD;	Department of Biomedical Engineering	Duke University	Durham	NC	US
111	Patrick J King; Mentor Thaqi; Emily Reisenbigler; Robert Marr; Daniel Peterson;	Center for Stem Cell and Regenerative Medicine	Rosalind Franklin University	North Chicago	IL	US
112	Tyler Davis MD PhD; Elliot Smith; Bornali Kundu MD; John Rolston;	Department of Neurosurgery	University of Utah	Salt Lake City	UT	US
113	Mark Connolly; Faical Isbaine PhD; Jon Timothy Willie MD PhD; Annaelle Devergnas PhD; Svjetlana Miocinovic;	Department of Neurosurgery	Emory University	Atlanta	GA	US
114	Joseph Samir Neimat MD MS; Raffaele Guida; Emrecan Demirors; Robert Wagner Bina MD MS; Ryan Burke; Steven Koenig; Tommaso Melodia; Jorge H Jimenez;	Department of Neurosurgery	University of Louisville	Louisville	KY	US
115	Koorosh Mirpour; Jeong Woo Choi; Kathryn Cross; Nader Pouratian MD PhD;	Department of Neurosurgery	UT Southwestern Medical Center	Dallas	TX	US
116	Philip A. Starr MD PhD; Roshini Jain; Lilly Chen; Alexander Tröster; Lauren Schrock; Paul A. House MD; Monique Giroux MD; Adam Olding Hebb MD, FRCSC; Sierra Farris; Donald M. Whiting MD, FAANS; Timothy Leichliter; Jill L. Ostrem MD; Marta San Luciano Palenzuela MD; Nicholas Galifianakis MD; Leo Verhagen Metman; Sepehr Sani MD; Jessica Karl; Mustafa Siddiqui; Stephen B. Tatter MD, PhD; Ihtsham ul …	Department of Neurosurgery	Universiry of California San Francisco	San Francisco	CA	US
117	Jorge U. Mañez-Miro; Rafael Rodríguez-Rojas; Jose A. Pineda-Pardo; Marta del Álamo ; Raúl Martínez-Fernández; Jose Obeso;	Department of Neurology	HM Centro Integral en Neurociencias AC (CINAC), University Hospital HM Puerta del Sur, CEU San Pablo University	Madrid		Spain
118	Jihye Ryu; Nader Pouratian MD PhD;	Department of Neurosurgery	UCLA	Los Angeles	CA	US
119	Kenneth Louie; Philip A. Starr MD PhD; Maria Yaroshinsky; Doris D. Wang MD PhD;	Department of Neurosurgery	UCSF	San Francisco	CA	US
120	Dennis London MD; Arash Fazl; Kalman Katlowitz MD; Marisol Soula; Michael Pourfar MD; Roozbeh Kiani; Alon Mogilner;	Department of Neurosurgery	NYU Langone Medical Center	New York	NY	US
121	Christopher R Conner MD; Keifer Forseth; Albert J. Fenoy MD;	Department of Neurosurgery	University of Texas Houston	Houston	TX	US
122	Ammar Shaikhouni MD PhD; Jonathan A. Pindrik MD; Kristen Arredondo; Adam Ostendorf; Daniel Alber; stephanie Ahrens; Christopher Beatty;	Department of Neurosurgery	The Ohio State University	Colombus	OH	US
123	Justin Michael Campbell; Elliot Smith; Tyler Davis MD PhD; John Rolston;	Department of Neurosurgery	University of Utah Medical School	Salt Lake City	UT	US
124	Graham Walter Johnson; Aarushi Negi; Derek Doss; Jasmine Jiang; Saramati Narasimhan; Danika Lea Paulo MD; Shawniqua Williams Roberson; Sarah KB Bick MD; Catie Chang; Victoria Morgan; Dario J. Englot MD PhD;	Department of Neurosurgery	Vanderbilt University	Nashville	TN	US
125	Bryan Zheng; Ben Hsieh; Nathaniel Rex; Peter Lauro; Scott Collins ; Andrew Blum; Julie Roth; Neishay Ayub; Wael Asaad MD, PhD;	Department of Neurosurgery	Warren Alpert Medical School of Brown University	Providence	RI	US
126	Nancy Zepeda; Sasha Medvidovic; Matthew Bergosh; Wooseong Choi; Darrin J. Lee MD PhD;	Department of Neurosurgery	University of Southern California	Los Angeles	CA	US
127	David Isaac Satzer MD; Yasar Esengul; Peter C. Warnke MD; Naoum Issa; Douglas Nordli Jr.;	Department of Neurosurgery	University of Chicago	Chicago	IL	US
128	Matthew A. Stern BS; Ken Berglund PhD; Jake Diamond; Robert E. Gross MD PhD;	Department of Neurosurgery	Emory University School of Medicine	Atlanta	GA	US
129	Nealen Laxpati MD, PhD; Eric Cole; Claire-Anne Gutekunst PhD; Robert E. Gross MD PhD;	Department of Neurosurgery	Emory University School of Medicine	Atlanta	GA	US
130	Brandon J Thio BS; Warren Grill PhD;	Department of Biomedical Engineering	Duke University	Durham	NC	US
131	Hongchae Baek; Larry O. Bodden; Daniel Lockwood; Emmanuel Obusez; Benjamin Walter; Stephen Jones; Sean Nagel;	Department of Neurosurgery	Cleveland Clinic	Cleveland	OH	US
132	Michael A. Jensen; Kai Joshua Miller PhD MD PhD;	Department of Neurosurgery	Mayo Clinic	Rochester	MN	US
133	Tyler Sparks; Fernando L. Vale MD; Kendyl Pennington; Christos Constantinidis; Jeannie Chen; Alvin Terry; Yi Zheng; Christopher Banerjee MD; Marc Plagenhoef ; David Blake;	Department of Neuroscience & Regenerative Medicine	Medical College of Georgia-Augusta University	Augusta	GA	US
134	Ali R. Rezai MD; Manish Ranjan ; Pierre D'Haese ; Jeffrey S. Carpenter MD; Marc Haut; Umer Najib; Daniel Claassen; Rashi Mehta; Levi Chazen; Zion Zibli; Peter Konrad MD PhD; Sally Hodder; Michael Gordon Kaplitt MD, PhD;	Department of Neurosurgery	Rockefeller Neuroscience Institute, West Virginia University	Morgantown	WV	US
135	Nicole Provenza; Sameer A. Sheth MD PhD; Evan Dastin-van Rijn; Raissa Mathura; Yaohan Ding; Greg Vogt; Michelle Avendano-Ortega; Nithya Ramakrishnan; Noam Peled; Luiz Fernando Fracassi Gelin; David Xing; Laszlo Jeni; Itir Onal Ertugrul; Adriel Barrios-Anderson; Evan Matteson; Andrew Wiese; Junqian Gordon Xu ; Ashwin Viswanathan MD; Matthew Harrison; Kelly R Bijanki PhD; Eric Storch; Jeffrey Cohn;…	Department of Neurosurgery	Baylor College of Medicine	Houston	TX	US
136	Ahmed M.T. Raslan MBBS MCh; Shadi Dayeh; Daniel Cleary MD, PhD; Youngbin Tchoe; Andrew Bourhis; Brittany Stedelin ; Dominic Aaron Siler MD PhD; Caleb Nerison; Angelique Paulk; Sharona Ben-Haim MD;	Department of Neurosurgery	Oregon Health & Science University	Beaverton	OR	US
137	Julie G. Pilitsis MD PhD; Shin-Yuan Chen MD, MSc; Marta Navas Garcia; Alfons Schnitzler; Leo Verhagen Metman; Yarema Basil Bezchlibnyk MD PhD; Alireza Gharabaghi; Caroline Giordana; Paolo Moretti; Sean Nagel; Keyoumars Ashkan; Barbara Changizi; Alexander Lehn; Pablo Mir; Rajesh Pahwa; Andrew Evans; Carla Piano; Luisa Solis-Cohen; Eero Pekkonen; Nestor Denys Tomycz MD; Joseph Neimat; Mike Frassica…	Neurosurgery	Florida Atlantic University		N\A
138	Sarah KB Bick MD; Yoaf Kfir; Syd Cash ; Ziv Williams;	Department of Neurosurgery	Vanderbilt University Medical Center	Nashville	TN	US
139	Benjamin Davidson; Peter Giacobbe; Tony George; Clement Hamani MD; Nir Lipsman MD, PhD;	Department of Surgery	University of Toronto	Toronto	ON	CA
140	Rajiv Sai Dharnipragada; Kellen Mulford; Madelyn Woolums; Andrew W. Grande MD; Donald Nixdorf; Stephen J. Haines MD, FACS; David P Darrow MD MPH;	Department of Neurosurgery	University of Minnesota	Minneapolis	MN	US
141	Tessa Harland MD; Michael Gillogly RN; Taylor Powell; Olga Khazen; Avi A Gajjar; Melisande Nabage; Frank Trujillo; Julie G. Pilitsis MD PhD;	Division of Neurosurgery	Albany Medical Center	Albany	NY	US
142	Matthew Willsey MD; James Michael Mossner MD; Cynthia Chestek; Oren Sagher MD, BA; Parag G. Patil MD PhD;	Department of Neurosurgery	University of Michigan	Ann Arbor	MI	US
143	Rose Caston; Tyler Davis MD PhD; Elliot Smith; John Rolston;	Department of Neurosurgery	University of Utah MD-PhD Program	Salt lake City	UT	US
144	Hao Tan; Edward Ward; Ahmed M.T. Raslan MBBS MCh;	Department of Neurosurgery	Oregon Health & Science University	Portland	OR	US
145	Phillip Demarest; Eric C. Leuthardt MD; Nabi Rustamov; Peter Brunner; Simon Haroutounian;	Department of Neurosurgery	Washington University School of Medicine	Saint Louis	MO	US
201	Evan Einstein; Ling Pan; Alon Y. Mogilner MD;	Department of Neurosurgery	NYU Langone Health	New York	NY	US
202	Vibhor Krishna MD; Francesco Sammartino; Matthew Eames; John W. Snell PhD;	Department of Neurosurgery	University of North Carolina	Chapel Hill	NC	US
203	Evan M Thomas MD PhD; Erik Middlebrooks; Barton Guthrie; Harrison Walker; John Fiveash MD; Richard Popple PhD; David Standaert; Markus Bredel MD PhD;	Department of Radiation Oncology	University of Alabama Birmingham	Birmingham	AL	US
204	Raúl Martínez-Fernández; Elena Natera-Villalba; Jorge U. Mañez-Miro; Rafael Rodríguez-Rojas; Marta del Álamo ; Jose A. Pineda-Pardo; Ignacio Obeso; Frida Hernandez-Fernandez; Carmen Gasca-Salas; Michele Matarazzo; Lydia Vela; Fernando Alonso-Frech; Jose Obeso;	Department of Neurology	HM Centro Integral en Neurociencias AC (CINAC), University Hospital HM Puerta del Sur, CEU San Pablo University	Madrid		Spain
205	Elena Natera-Villalba; Raúl Martínez-Fernández; Rafael Rodríguez-Rojas; Marta del Álamo ; Jose A. Pineda-Pardo; Ignacio Obeso; Frida Hernandez-Fernandez; Carmen Gasca-Salas; Michele Matarazzo; Jose Obeso;	Department of Neurology	HM Centro Integral en Neurociencias AC (CINAC), University Hospital HM Puerta del Sur, CEU San Pablo University	Madrid		Spain
206	Abhijeet Gummadavelli MD; Robert Sterner; Veronica Chiang MD;	Department of Neurosurgery	Yale University Neurosurgery	New Haven	CT	US
207	Matthew Willsey MD; Samuel Nason; Scott Ensel; Hisham Temmar; Joseph Costello; Cynthia Chestek; Parag G. Patil MD PhD;	Department of Neurosurgery	University of Michigan	Ann Arbor	MI	US
208	Sunderland Baker; Andy Tekriwal; Steven Ojemann; Daniel R. Kramer MD; Gidon Felsen PhD; John Thompson PhD; Drew Kern MD MS;	Department of Neurosurgery	University of Colorado Anschutz School of Medicine	Aurora	CO	US
209	Kai Joshua Miller PhD MD PhD; Michael A. Jensen; Dora Hermes; Alexander Belsten; Peter Brunner; Gregory A. Worrell ; Gerwin Schalk;	Department of Neurosurgery	Mayo Clinic	Rochester	MN	US
210	Jessica Shields MD, PhD; Alexander Craig McConnell Greven ; Nealen Laxpati MD, PhD; Robert E. Gross MD PhD;	Department of Neurosurgery	Emory University	Atlanta	GA	US
211	Mani Ratnesh Singh Sandhu; Abhijeet Gummadavelli MD; Mark Bower; Jon Zhou; Roni Dhaher; Victoria Phoumthipphavong; Hitten Zaveri; Dennis D. Spencer MD; Tore Eid MD PhD; Jason L. Gerrard MD PhD;	Department of Neurosurgery	Yale University School of Medicine	New Haven	CT	US
212	Adeel Ilyas MD; Laura Bertran; Stephen Thompson; Nitin Tandon MD FAANS;	Department of Neurosurgery	University of Alabama Birmingham	Birmingham	AL	US
213	Mostafa Fatehi Hassanabad MD; Ruchen Guo; Amir Ali Sepehry; Walter Hader;	Department of Clinical Neurosciences	University of Calgary	Calgary		CA
214	Pranav Nanda MPhil; Zachary Kons; Athar N. Malik MD, PhD; Nathaniel Sisterson; Nora Daly; Vasileios Kokkinos PhD; Robert Mark Richardson MD, PhD;	Department of Neurosurgery	Massachusetts General Hospital	Boston	MA	US
215	Arjun Khanna MD; Pranav Nanda MPhil; Catherine Chu; Sydney Cash ; Vasileios Kokkinos PhD; Robert Mark Richardson MD, PhD;	Department of Neurosurgery	Massachusetts General Hospital Neurosurgery	Boston	MA	US
216	Muriel Mardones; Kunal Gupta MD PhD;	Department of Neurosurgery	Indiana University School of Medicine	Indianapolis	IN	US
217	Nolan James Brown; Ali Reza Tafreshi; Alvin Chan MD; Brian Lien; Elliot Choi; Frank P.K. Hsu MD; Sumeet Vadera MD;	Department of Neurosurgery	University of California, Irvine School of Medicine	Orange	CA	US
218	Jason K Hsieh MD; Francesco Pucci MD; Swetha J Sundar MD; Efstathios Kondylis MD; Akshay Sharma BA; Shehryar R Sheikh AB; Deborah Vegh; Ahsan Moosa Naduvil; Ajay Gupta; Richard Rammo MD; William E. Bingaman MD; Lara Jehi MD;	Department of Neurosurgery	Cleveland Clinic Foundation	Cleveland	OH	US
219	Nealen Laxpati MD, PhD; Mark Connolly; Alejandra Fernandez; Claire-Anne Gutekunst PhD; Robyn Selawski; Joshua J Chern MD PhD; Annaelle Devergnas PhD; Robert E. Gross MD PhD;	Department of Neurosurgery	Emory University School of Medicine	Atlanta	GA	US
220	Francesco Pucci MD; Kenneth Taylor; Dileep Nair MD;	Epilepsy Center	Cleveland Clinic Foundation	Cleveland	OH	US
221	Arka Mallela MD, MS; Jorge Alvaro González-Martínez MD, PhD; Hussam Abou-Al-Shaar MD; Michael Maurice McDowell MD; Luke Henry; Alexandra Urban; Joanna Fong-isariyawongse; Niravkumar Barot; James Castellano; Vijayalakshmi Rajasekaran ; Anto Bagic; Carl H. Snyderman MD; Paul A. Gardner MD;	Department of Neurosurgery	University of Pittsburgh	Pittsburgh	PA	US
222	Wendell Bradley Lake MD; Urszula Girska; Aaron Suminski; Elsa Juan; Csaba Kozma; Cynthia Papantonatos; Tom Bugnon; Colin Denis; Vaclav Kremen; Gregory A. Worrell ; Aaron Struck; Lisa Bateman; Edward Merricks; Hal Blumenfeld ; Giulio Tononi; Catherine Schevon ; Melanie Boly;	Department of Neurosurgery	University of Wisconsin-Madison	Madison	WI	US
223	Jason Aldred; Theresa Zesiewicz; Juan Ramirez-Castaneda; Michael S. Okun MD; Corneliu Luca; Ritesh Ramdhani; Leo Verhagen Metman; Jennifer Durphy; Mustafa Siddiqui; Yarema Basil Bezchlibnyk MD PhD; Jonathan Dennis Carlson MD PhD; Kelly D. Foote MD; Sepehr Sani MD; David Weintraub MD; Jonathan R. Jagid MD; Julie G. Pilitsis MD PhD; Lilly Chen; Roshini Jain;	N/A	Selkirk Neurology	Spokane	WA	US
224	Derek Doss; Graham Walter Johnson; Saramati Narasimhan; Jasmine Jiang; Hernan FJ Gonzalez PhD; Danika Lea Paulo MD; Benoit M. Dawant PhD; Catie Chang; Victoria Morgan; Christos Constantinidis; Dario J. Englot MD PhD;	Department of Neurosurgery	Vanderbilt University	Nashville	TN	US
225	Vyshak Chandra MD; Yusuf Mehkri; Anuj Desai; Chadwin Hanna; Jairo Hernandez; Abraham Alvarado-Gonzalez MD; Joshua Wong; Justin D Hilliard MD; Kelly D. Foote MD;	Department of Neurosurgery	University of Florida	Gainesville	FL	US
226	Akshay Rao; Charles Lu; Asra Askari; Karlo Malaga; Kelvin Chou; Parag G. Patil MD PhD;	Department of Neurosurgery	University of Michigan Health System	Ann Arbor	MI	US
227	Akshay Rao; Aidan Ahamparam; Kelvin Chou; Parag G. Patil MD PhD;	Department of Neurosurgery	University of Michigan Health System	Ann Arbor	MI	US
228	Aislyn DiRisio BS; Josue Moises Avecillas-Chasin MD PhD; Samantha Platt; Martijn Figee; Joohi Jimenez-Shahed ; Helen S. Mayberg MD; Ki Sueng Choi; Brian H. Kopell MD;	Department of Neurosurgery	Icahn School of Medicine at Mount Sinai	New York	NY	US
229	Saswat Sahoo; Mihika Thapliyal; Francesco Pucci MD; Hongchae Baek; Emmanuel Obusez; Daniel Lockwood; Stephen Jones; Sean Nagel;	Department of Neurosurgery	Cleveland Clinic Lerner College of Medicine	Cleveland	OH	US
230	Samuel Nason; Matthew Mender; Eric Kennedy; Joris Lambrecht; Kevin Kilgore; Srinivas Chiravuri; Nishant Ganesh Kumar; Theodore Kung; Matthew Willsey MD; Cynthia Chestek; Parag G. Patil MD PhD;	Department of Neurosurgery	University of Michigan	Ann Arbor	MI	US
231	Alaa Taha; Greydon Gilmore; Ali Khan; Jonathan C Lau MD, PhD;	Division of Neurosurgery	University of Western Ontario	London	N\A	CA
232	Tamara Stiep; adolfo ramirez-zamora; Alexander Tröster; Roshini Jain; Lilly Chen; Mahsa Malekmohammadi; Michael S. Okun MD;	Norman Fixel Institute for Neurological Diseases	University of Florida Health	Gainesville	FL	US
233	Alexander Alley; Joseph Neimat; Scott Wylie; Robert Underwood; Nelleke van Wouwe;	Department of Neurosurgery	University of Louisville	Louisville	KU	US
234	Sydnei Lewis; Lisa Hirt; Michelle Case; Christopher Pulliam; James Eubanks; Steve Goetz; Robert Raike; Steven Ojemann; Daniel R. Kramer MD; Drew Kern; John Thompson PhD;	Department of Neurosurgery	University of Colorado Anschutz School of Medicine	Aurora	CO	US
235	Josue Moises Avecillas-Chasin MD PhD; Christopher Honey MD PhD; Manraj S. Heran MD; Marie Krüger;	Department of Neurosurgery	University of Nebraska Medical Center	Omaha	NE	US
236	Danika Lea Paulo MD; Saramati Narasimhan; Hernan FJ Gonzalez PhD; Jackson Allen; Rui Li; William Rodriguez MEd; Peter Konrad MD PhD; Joseph Samir Neimat MD MS; Hamid M. Shah MD, FAANS; Sarah KB Bick MD; Benoit Dawant; Dario J. Englot MD PhD;	Department of Neurosurgery	Vanderbilt University Medical Center	Nashville	TN	US
237	Hamid M. Shah MD, FAANS; Peter Konrad MD PhD;	Department of Neurosurgery	Vanderbilt University Medical Center	Nashville	TN	US
238	Neil Rasiah; Romir Maheshwary ; Churl-Su Kwon MD MPH; Joshua Bloomstein; Fady M. Girgis BSc Pharm MD EdM FRCSC;	Department of Neurosurgery	Cumming School of Medicine, University of Calgary	Calgary	N\A	CA
239	Jacob Hanson; Alec Jonason ; James Jean; Robert Allen McGovern MD;	Department of Neurosurgery	University of Minnesota Department of Neurosurgery	Minneapolis	MN	US
240	John James Pearce MD; Sepehr Sani;	Department of Neurosurgery	Rush University Medical Center	Chicago	IL	US
241	Jan Vesper MD; Roshini Jain; Heleen Scholtes; Alex Wang MS; Michael T Barbe ; Steffen Paschen MD; Andrea Kühn MD; Jens Volkmann; Chong Sik Lee; Günther Deuschl MD;	Dept. of Functional Neurosurgery and Stereotaxy	Heinrich Heine University	Dusseldorf	N\A	Germany
242	julien engelhardt; emmanuel cuny; Nejib Zemzemi; Dominique Guehl; Nathalie Damon-Perriere; Pierre Burbaud;	Service de Neurochirurgie	University of Bordeaux	Bordeaux	N\A	France
243	Nicholas James Brandmeir MD MS; Vishal Thakur; Muhammad Babar Khan MD;	Department of Neurosurgery	WVU Dept of Neurosurgery	Morgantown	WV	US
244	Enrico Opri; Faical Isbaine PhD; Nicholas Au Yong MD PhD; Jon Timothy Willie MD PhD; Nicholas M. Boulis MD; Thomas Wichmann; Robert E. Gross MD PhD; Svjetlana Miocinovic;	Department of Neurology	Emory University School of Medicine	Atlanta	GA	UA
245	Hailey Budnick MD; Kunal Gupta MD PhD;	Department of Neurosurgery	Indiana University School of Medicine	Indianapolis	IN	US
246	Henry M Skelton; Dayton Grogan; Nealen Laxpati MD, PhD; Robert E. Gross MD PhD; Nicholas Au Yong MD PhD; Svjetlana Miocinovic;	Department of Neurology	Emory University School of Medicine	Atlanta	GA	US
247	Kuang-Hsuan Chen; Austin M. Tang BS MPH; Zachary Gilbert; Roberto Martin del Campo-Vera PhD; Rinu Sebastian ; Arthur Shao; Emiliano Tabarsi; Ryan Chung; Shivani Sundaram; Alexandra Kammen MD; Jonathon Cavaleri MD; Angad S. Gogia BS; Xenos Mason; Christi Heck; George Nune; Charles Y. Liu MD, PhD; Spencer Kellis; Brian Lee MD PhD;	Department of Neurosurgery	Keck School of Medicine of USC	Los Angeles	CA	US
248	Zachary Gilbert; Ryan Chung; Kuang-Hsuan Chen; Austin M. Tang BS MPH; Emiliano Tabarsi; Shivani Sundaram; Roberto Martin del Campo-Vera PhD; Arthur Shao; Rinu Sebastian ; Alexandra Kammen MD; Jonathon Cavaleri MD; Angad S. Gogia BS; Xenos Mason; Christi Heck; George Nune; Charles Y. Liu MD, PhD; Spencer Kellis; Brian Lee MD PhD;	Department of Neurosurgery	Keck School of Medicine of USC	Los Angeles	CA	US
249	Mohamad Abbass; Renee Johnston; Benjamin Corrigan; Roberto Gulli; Adam J. Sachs MD; Jonathan C Lau MD, PhD; Julio Martinez-Trujillo;	Division of Neurosurgery	University of Western Ontario	London	ON	CA
250	Zachary Gilbert; Roberto Martin del Campo-Vera PhD; Austin M. Tang BS MPH; Kuang-Hsuan Chen; Rinu Sebastian ; Arthur Shao; Emiliano Tabarsi; Ryan Chung; Shivani Sundaram; Alexandra Kammen MD; Jonathon Cavaleri MD; Angad S. Gogia BS; Xenos Mason; Christi Heck; George Nune; Charles Y. Liu MD, PhD; Spencer Kellis; Brian Lee MD PhD;	Department of Neurosurgery	Keck School of Medicine of USC	Los Angeles	CA	US
251	James Trevathan; Kevin Cheng; Brandon Coventry; Hyun-Joo Park; Wendell Bradley Lake MD; Kip Ludwig, Ph.D; Erika Ross; Aaron J Suminski PhD;	Department of Neurosurgery	University of Wisconsin-Madison	Madison	WI	US
252	Anand Tekriwal BA; Gidon Felsen PhD; Steven Ojemann MD; Aviva Abosch MD PhD; John Thompson PhD;	Department of Neurosurgery	University of Colorado Anschutz School of Medicine	Denver	CO	US
253	Roberto Martin del Campo-Vera PhD; Zachary Gilbert; Austin M. Tang BS MPH; Jonathon Cavaleri MD; Arthur Shao; Kuang-Hsuan Chen; Rinu Sebastian ; Emiliano Tabarsi; Ryan Chung; Shivani Sundaram; Alexandra Kammen MD; Angad S. Gogia BS; Xenos Mason; Christi Heck; George Nune; Charles Y. Liu MD, PhD; Spencer Kellis; Brian Lee MD PhD;	Department of Neurosurgery	Keck School of Medicine of USC	Los Angeles	CA	US
254	Eric Cole; Lou T Blanpain; Nealen Laxpati MD, PhD; Robert E. Gross MD PhD;	Department of Neurosurgery	Emory University School of Medicine	Atlanta	GA	US
255	Helen Qian; Danika Lea Paulo MD; Deeptha Subramanian; Kaltra Dhima; Sarah KB Bick MD;	Department of Neurosurgery	Vanderbilt University	Nashville	TN	US
256	Clayton Bingham; Cameron C. McIntyre PhD;	Department of Biomedical Engineering	Duke University	Durham	NC	US
257	Jay Gill; Mahmoud Omidbeigi; Nanthia Suthana; Ausaf A Bari AB MA MD PhD;	Department of Neurosurgery	University of California, Los Angeles	Los Angeles	CA	US
258	Jordan Christopher Iordanou MD, PhD; Jennifer Schreiber; Shih-Yen Tsai; Son Ton; Akram Imam; Brian Powers; James Walter; Martin Oudega; Gwendolyn Kartje; Russ P. Nockels MD, FAANS;	Department of Neurosurgery	Loyola University Medical Center	Chicago	IL	US
259	MARKUS ADAMEK; Jon Timothy Willie MD PhD; James Swift; Lawrence Eisenman; John Zempel; Cory Inman; Peter Brunner;	Department of Neurosurgery	Washington University in St. Louis	St. Louis	MO	US
262	Konstantin V. Slavin MD; Marc Huntoon; Jonathan Hagedorn; Nate Crosby PhD; Joseph Boggs PhD;	N/A	SPR Therapeutics	Cleveland	OH	US
263	Kunal Gupta MD PhD;	Department of Neurosurgery	Indiana University School of Medicine	Indianapolis	IN	US
264	Josue Moises Avecillas-Chasin MD PhD; Ki Sueng Choi; Andrew H. Smith; Helen S. Mayberg MD; Cristina Nombela; Bryan Strange; Juan Antonio Barcia Albacar; Martijn Figee; Brian H. Kopell MD;	Department of Neurosurgery	University of Nebraska Medical Center	Omaha	NE	US
265	Jon Timothy Willie MD PhD; Daniel Drane PhD; Kelly R Bijanki PhD; Jennifer Stevens; Sean Minton; Abigail Powers; Tanja Jovanovic; Sanne van Rooij;	Department of Neurosurgery	Washington University in St. Louis	St Louis	MO	US
266	John Myers; Jiayang Xiao; Brian Metzger; Joshua Adkinson; Anusha Allawala; Victoria Pirtle ; Raissa Mathura; Adrish Anand; Ron Gadot ; Ricardo Andres Najera; Hernan Gonzalo Rey; Wayne Goodman; Sanjay Mathew ; Nader Pouratian MD PhD; Kelly R Bijanki PhD; Sameer A. Sheth MD PhD;	Department of Neurosurgery	Baylor College of Medicine	Houston	TX	US
267	Anusha Allawala; Joshua Adkinson; Denise Oswalt; Raissa Mathura; Wayne Goodman; Nader Pouratian MD PhD; Kelly R Bijanki PhD; David Borton; Sameer A. Sheth MD PhD;	Department of Biomedical Engineering	Brown University	Providence	RI	US
268	Wooseong Choi; Kofi Agyeman; Lindsey Crown; Naim Lazkani; Isabella Hoang; Nancy Zepeda; Charles Y. Liu; Vasileios Christopoulos; Darrin J. Lee MD PhD;	Department of Neurosurgery	University of Southern California	Los Angeles	CA	US
270	Ki Sueng Choi; Juna Khang; Andreas Horn; Patricio Riva Posse MD; Helen S. Mayberg MD;	Department of Neurosurgery	Ichan School of Medicine at Mount Sinai	New York	NY	US
271	Zahraa Fadhil Al-Sharshahi ; Lea Tortolero; Asam Saad; James Young; Lara Marcuse; Lizbeth Nunez Martinez ; Ignacio Saez; Fedor Panov MD;	Department of Neurosurgery	Icahn School of Medicine at Mount Sinai	NEW YORK	NY	US
272	Brian Metzger; Prathik Kalva; Madaline Mocchi; Brian Cui; Joshua Adkinson; Zhengjia Wang; Raissa Mathura; Adrish Anand; Ben Shofty MD; Sameer A. Sheth MD PhD; Kelly R Bijanki PhD;	Department of Neurosurgery	Baylor College of Medicine	Houston	TX	US
273	Ben Shofty MD; Ron Gadot ; Ashwin Viswanathan MD; Nicole Provenza; Eric Storch; Greg Vogt; Matthew Meyers; Michelle Avendano-Ortega; Wayne Goodman; Sameer A. Sheth MD PhD;	Department of Neurosurgery	Baylor College of Medicine	Houston	TX	US
274	Lea Tortolero; Zahraa Fadhil Al-Sharshahi ; Asam Saad; James Young; Lara Marcuse; Lizbeth Nunez Martinez ; Faris Gulamali; Ignacio Saez; Fedor Panov MD;	Department of Neurosurgery	Icahn Medical School at Mount Sinai	New York	NY	US
275	Khashayar Mozaffari; Katherine Hofmann; Eric Chalif; Paul B Boyd; Archana Pasupuleti; William Gaillard ; Chima Oluigbo MD;	Department of Neurosurgery	Children's National Medical Center	Washington	DC	US
276	Martina Mustroph MD/PhD; Patrick Ng; Yoav Kfir; Ziv Williams MD;	Department of Neurosurgery	Brigham and Women's Hospital	Boston	MA	US
277	Adeel Ilyas MD; Laura Bertran; Stephen Thompson; Nitin Tandon MD FAANS;	Department of Neurosurgery	University of Alabama Birmingham	Birmingham	AL	US
278	Hernan FJ Gonzalez PhD; Tyler Joseph Ball MD; Niyatee Samudra; Eric Armour; Danika Lea Paulo MD; Saramati Narasimhan; Bassel Abou-Khalil; Kevin Haas; Sarah KB Bick MD; Dario J. Englot MD PhD;	Department of Neurosurgery	Vanderbilt University	Nashville	TN	US
279	Jonathan C Lau MD, PhD; Dayton Grogan; Pia Mendoza; Neal Laxpati; Daniel Drane PhD; Matthew Schniederjan; KATIE Bullinger; Jon Timothy Willie MD PhD; Robert E. Gross MD PhD;	Division of Neurosurgery	University of Western Ontario	London	ON	CA
280	Islam Fayed MD; Armin Mortazavi; Alexander Ksendzovsky MD; Marcelle Altshuler BS; Kareem A. Zaghloul MD PhD; Dragan Maric;	Neurosurgery Clinic	National Institute of Health	Bethesda	MD	US
281	Andrew Willett; Meena Vessell MD; Joseph Neimat; Brittany Chapman ;	Department of Neurosurgery	University of Louisville	Louisville	KY	US
282	Mihika Thapliyal; Saswat Sahoo; Francesco Pucci MD; Hongchae Baek; Emmanuel Obusez; Daniel Lockwood; Stephen Jones; Sean Nagel;	Center for Neuro-Restoration	Cleveland Clinic Lerner College of Medicine	Cleveland	OH	US
283	Mohamad Abbass; Greydon Gilmore; Alan Chalil MD; Brendan Santyr; Andrew Parrent ; Keith MacDougall MD; Jonathan C Lau MD, PhD;	Division of Neurosurgery	University of Western Ontario	London	ON	CA
284	Christopher miller MD; Jennifer Muller ; Angela Noecker; Caio M Matias MD PhD; Cameron C. McIntyre PhD; Chengyuan Wu MD MSBmE;	Department of Neurosurgery	Thomas Jefferson University	Philadelphia	PA	US
285	Shaquia Idlett-Ali; Rex Tien; Marielle Darwin; John Thompson PhD; Daniel R. Kramer MD;	Department of Neurosurgery	University of Colorado Anschutz Medical Campus	Aurora	CO	US
286	Rex Tien; Jonathan Platt; Madelyn Mendlen; Linea Gutierrez; Drew Kern MD MS; Steven Ojemann MD; John Thompson PhD; Daniel R. Kramer MD;	Department of Neurosurgery	University of Colorado Anschutz Medical Campus	Aurora	CO	US
287	Asra Askari ; Brandon Zhu; Kelvin Chou; Parag G. Patil MD PhD;	Department of Neurosurgery	University of Michigan	ANN ARBOR	MI	US
288	Wooseong Choi; Kaevon Brasfield; Kevin Wu; Jonathan Cavaleri; Robert G. Briggs MD; Melanie Cohn; Brian Lee MD PhD; Xenos Mason; Darrin J. Lee MD PhD;	Department of Neurosurgery	Keck School of Medicine of USC	Los Angeles	CA	US
289	Jordan Lam MBBS BSc; Asra Askari ; Taylor Greif; Xiru Lyu; amanda maher; carol persad; Kelvin Chou; Parag G. Patil MD PhD;	Department of Neurosurgery	University of Michigan	Ann Arbor	MI	US
290	Jan Vesper MD; Roshini Jain; Heleen Scholtes; Alex Wang MS; Michael T Barbe ; Steffen Paschen MD; Andrea Kühn MD; Jens Volkmann; Chong Sik Lee; Günther Deuschl MD;	Dept. of Functional Neurosurgery and Stereotaxy	Heinrich Heine University	Dusseldorf	N\A	Germany
291	Daniel Zhang; John James Pearce MD; Edgar Petrosyan; Alireza Borghei; Sepehr Sani;	Department of Neurosurgery	Rush University Medical Center	Chicago	IL	US
292	Zachary Kons; Amir Hadanny MD; Alan Bush; Pranav Nanda MD; Varun Saravanan; Todd Herrington ; Robert Mark Richardson MD, PhD;	Department of Neurosurgery	Massachusetts General Hospital	Boston	MA	US
293	Patrick Ng; Alfredo Morales Pinzon; Fardad Behzadi; Michele Cavallari; Andrzej Marciniak; Grégory Bliault; Kezia Irene; David J Segar MD; Matthew N. DeSalvo; Jason White; Nathan McDannold; Charles R.G. Guttmann; G. Rees "Rees" Cosgrove MD, FRCS(C), FAANS;	Department of Neurosurgery	Harvard Medical School	Boston	MA	US
295	Graham Winston BA; Sara Strauss; Kristen Leeman; Arindaram RoyChoudhury; Charlene Thomas; Levi Chazen; Michael Gordon Kaplitt MD, PhD;	Neurological Surgery	Weill Cornell Medicine	New York City	NY	US

## Sheet: in
Final #	Authors In Submission	SubmitterInstitution	Email	Address1	Address2	Address3	City	State	Country
101	Felipe Gutierrez Pineda; Hector Alfredo Jaramillo ; Vicente Jaramillo ; Maria Paula Fernandez Gomez ;	Hospital San Rafael Angostura	felipegpp23@gmail.com				Antioquia	N\A		Colombia
102	Ryan McCormack MD, PhD; Nitin Tandon MD FAANS;	McGovern Medical School at UT Health	ryan.m.mccormack@uth.tmc.edu	6400 Fannin Street, Room 2800	Department of Neurosurgery		Houston	TX	US
103	Josue Moises Avecillas-Chasin MD PhD; Tommaso Galbiati; Mauro Porta; Domenico Servello;	University of Nebraska Medical Center	javecillaschasin@unmc.edu	1562 Waller Street			Omaha	NE	US
104	Muhammad El Shatanofy; Katherine Hofmann; John S. Myseros MD; William Gaillard ; Robert F. Keating MD; Chima Oluigbo;	Children's National Medical Center	melshatanofy@gwu.edu					N\A
105	Ben Shofty MD; Himanshu Sharma MD, PhD; Ron Gadot ; Huy Dang; Jay R. Gavvala ; Vaishnav Krishnan; Alica Goldman; mostafa Hotait; Piotr Olejniczak; Kimberly Houck; Cristina Trandafir; Daniel J. Curry; Sameer A. Sheth; Irfan Ali;	Baylor College of Medicine	shoftyben@gmail.com	175 N Medical Dr. E 5th floor			Salt Lake City	UT	US
106	Carlos Emilio Restrepo MD; Nitin Tandon MD FAANS;	Memorial Hermann Hospital, Texas Medical Center	carlosemilio.restrepo@gmail.com	3838 North Braeswood Bulevard apt 147			Houston	TX	US
107	W. Jeffrey Elias MD; Shayan Moosa MD; Chang-Chia Liu BS MSc PhD;	Univ. of Virginia Health Systems	wje4r@virginia.edu	123 Bollingwood Road			Charlottesville	VA	US
108	Yueh-Hsin Lin; Nicholas Bernard Dadario; Lewis Crawford; Hsu-Kang Dow; Onur Tanglay; Isabella Young; Syed Ahsan; Stephane Doyen; Michael Sughrue;	Omniscient Neurotechnology	isabella.young@o8t.com					N\A
109	Cihan Mehmet Kadipasaoglu MD; Nitin Tandon MD FAANS;	McGovern Medical School at UT Health	cihan.m.kadipasaoglu@uth.tmc.edu	6400 Fannin Street	Room 2800	Department of Neurosurgery	Houston	TX	US
110	Angela Noecker; Jeff Mlaker; Mark Griswold PhD; Cameron C. McIntyre PhD;	Duke University	cameron.mcintyre@duke.edu	Case Western Reserve University	10900 Euclid Avenue		Durham	NC	US
111	Patrick J King; Mentor Thaqi; Emily Reisenbigler; Robert Marr; Daniel Peterson;	Rosalind Franklin University	patrick.king@my.rfums.org	3333 Green Bay Rd		Rosalind Franklin University	North Chicago	IL	US
112	Tyler Davis MD PhD; Elliot Smith; Bornali Kundu MD; John Rolston;	University of Utah	tyler.davis@hsc.utah.edu	University of Utah	Clinical Neurosciences Center, 175 N. Medical Drive East	Department of Neurosurgery	Salt Lake City	UT	US
113	Mark Connolly; Faical Isbaine PhD; Jon Timothy Willie MD PhD; Annaelle Devergnas PhD; Svjetlana Miocinovic;	Emory University	mark.connolly@emory.edu	atlanta			Atlanta	GA	US
114	Joseph Samir Neimat MD MS; Raffaele Guida; Emrecan Demirors; Robert Wagner Bina MD MS; Ryan Burke; Steven Koenig; Tommaso Melodia; Jorge H Jimenez;	University of Louisville	jneimat@gmail.com	220 Abraham Flexner Drive	Department of Neurological Surgery		Louisville	KY	US
115	Koorosh Mirpour; Jeong Woo Choi; Kathryn Cross; Nader Pouratian MD PhD;	UT Southwestern Medical Center	koorosh.mirpour@utsouthwestern.edu					N\A
116	Philip A. Starr MD PhD; Roshini Jain; Lilly Chen; Alexander Tröster; Lauren Schrock; Paul A. House MD; Monique Giroux MD; Adam Olding Hebb MD, FRCSC; Sierra Farris; Donald M. Whiting MD, FAANS; Timothy Leichliter; Jill L. Ostrem MD; Marta San Luciano Palenzuela MD; Nicholas Galifianakis MD; Leo Verhagen Metman; Sepehr Sani MD; Jessica Karl; Mustafa Siddiqui; Stephen B. Tatter MD, PhD; Ihtsham ul …	Boston Scientific	daniel.halperin@bsci.com					N\A
117	Jorge U. Mañez-Miro; Rafael Rodríguez-Rojas; Jose A. Pineda-Pardo; Marta del Álamo ; Raúl Martínez-Fernández; Jose Obeso;	HM Centro Integral en Neurociencias AC (CINAC), University Hospital HM Puerta del Sur, CEU San Pablo University	jormami1987@gmail.com	Madrid			Madrid	Madrid	ES
118	Jihye Ryu; Nader Pouratian MD PhD;		jihyeryu@mednet.ucla.edu					N\A
119	Kenneth Louie; Philip A. Starr MD PhD; Maria Yaroshinsky; Doris D. Wang MD PhD;	UCSF	kenneth.louie@ucsf.edu					N\A
120	Dennis London MD; Arash Fazl; Kalman Katlowitz MD; Marisol Soula; Michael Pourfar MD; Roozbeh Kiani; Alon Mogilner;	NYU Langone Medical Center	Dennis.London@med.nyu.edu					N\A
121	Christopher R Conner MD; Keifer Forseth; Albert J. Fenoy MD;	University of Texas Houston	albert.j.fenoy@uth.tmc.edu	6400 Fannin	Suite 2800		Houston	TX	US
122	Ammar Shaikhouni MD PhD; Jonathan A. Pindrik MD; Kristen Arredondo; Adam Ostendorf; Daniel Alber; stephanie Ahrens; Christopher Beatty;	The Ohio State University	ashaikhouni@gmail.com	2800 south dorchester road			columbus	OH	US
123	Justin Michael Campbell; Elliot Smith; Tyler Davis MD PhD; John Rolston;	University of Utah	Justin.campbell@hsc.utah.edu	30 N 1900 E	2739 S Highland Dr	University of Utah Medical School	Salt Lake City	UT	US
124	Graham Walter Johnson; Aarushi Negi; Derek Doss; Jasmine Jiang; Saramati Narasimhan; Danika Lea Paulo MD; Shawniqua Williams Roberson; Sarah KB Bick MD; Catie Chang; Victoria Morgan; Dario J. Englot MD PhD;	Vanderbilt University	graham.w.johnson@vanderbilt.edu	1161 21st Ave S	D3300		Nashville	TN	US
125	Bryan Zheng; Ben Hsieh; Nathaniel Rex; Peter Lauro; Scott Collins ; Andrew Blum; Julie Roth; Neishay Ayub; Wael Asaad MD, PhD;	Warren Alpert Medical School of Brown University	bryan_zheng@brown.edu	12 Arrowhead Lane			Providence	RI	US
126	Nancy Zepeda; Sasha Medvidovic; Matthew Bergosh; Wooseong Choi; Darrin J. Lee MD PhD;	University of Southern California	wooseong@usc.edu	Los Angeles		University of Southern California	Los Angeles	CA	US
127	David Isaac Satzer MD; Yasar Esengul; Peter C. Warnke MD; Naoum Issa; Douglas Nordli Jr.;	University of Chicago	dsatzer@gmail.com	The University of Chicago	5841 S. Maryland Avenue	Neurosurgery: MC 3026/J341	Chicago	IL	US
128	Matthew A. Stern BS; Ken Berglund PhD; Jake Diamond; Robert E. Gross MD PhD;	Emory University School of Medicine	matthew.a.stern@emory.edu	Emory University	101 Woodruff Circle	Neurosurgery	Atlanta	GA	US
129	Nealen Laxpati MD, PhD; Eric Cole; Claire-Anne Gutekunst PhD; Robert E. Gross MD PhD;	Emory University School of Medicine	nlaxpat@emory.edu	1661 La France Street NE, Unit 412			Atlanta	GA	US
130	Brandon J Thio BS; Warren Grill PhD;	Duke University	brandon.thio@duke.edu	Duke University	101 Science Drive	Biomedical Engineering	Durham	NC	US
131	Hongchae Baek; Larry O. Bodden; Daniel Lockwood; Emmanuel Obusez; Benjamin Walter; Stephen Jones; Sean Nagel;	Cleveland Clinic	baekh@ccf.org	Cleveland			Cleveland	OH	US
132	Michael A. Jensen; Kai Joshua Miller PhD MD PhD;	Mayo Clinic	jensen.michael1@mayo.edu	rochester			rochester	MN	US
133	Tyler Sparks; Fernando L. Vale MD; Kendyl Pennington; Christos Constantinidis; Jeannie Chen; Alvin Terry; Yi Zheng; Christopher Banerjee MD; Marc Plagenhoef ; David Blake;	Medical College of Georgia-Augusta University	fvalediaz@augusta.edu	2338 Kings Way			Augusta	GA	US
134	Ali R. Rezai MD; Manish Ranjan ; Pierre D'Haese ; Jeffrey S. Carpenter MD; Marc Haut; Umer Najib; Daniel Claassen; Rashi Mehta; Levi Chazen; Zion Zibli; Peter Konrad MD PhD; Sally Hodder; Michael Gordon Kaplitt MD, PhD;	Rockefeller Neuroscience Institute, West Virginia University	ali.rezai@hsc.wvu.edu	33 Medical Center Drive			Morgantown	WV	US
135	Nicole Provenza; Sameer A. Sheth MD PhD; Evan Dastin-van Rijn; Raissa Mathura; Yaohan Ding; Greg Vogt; Michelle Avendano-Ortega; Nithya Ramakrishnan; Noam Peled; Luiz Fernando Fracassi Gelin; David Xing; Laszlo Jeni; Itir Onal Ertugrul; Adriel Barrios-Anderson; Evan Matteson; Andrew Wiese; Junqian Gordon Xu ; Ashwin Viswanathan MD; Matthew Harrison; Kelly R Bijanki PhD; Eric Storch; Jeffrey Cohn;…	Baylor College of Medicine	nicole.provenza@bcm.edu	Providence			Houston	TX	US
136	Ahmed M.T. Raslan MBBS MCh; Shadi Dayeh; Daniel Cleary MD, PhD; Youngbin Tchoe; Andrew Bourhis; Brittany Stedelin ; Dominic Aaron Siler MD PhD; Caleb Nerison; Angelique Paulk; Sharona Ben-Haim MD;	Oregon Health & Science University	raslana@ohsu.edu	9398 SW 153rd Avenue			Beaverton	OR	US
137	Julie G. Pilitsis MD PhD; Shin-Yuan Chen MD, MSc; Marta Navas Garcia; Alfons Schnitzler; Leo Verhagen Metman; Yarema Basil Bezchlibnyk MD PhD; Alireza Gharabaghi; Caroline Giordana; Paolo Moretti; Sean Nagel; Keyoumars Ashkan; Barbara Changizi; Alexander Lehn; Pablo Mir; Rajesh Pahwa; Andrew Evans; Carla Piano; Luisa Solis-Cohen; Eero Pekkonen; Nestor Denys Tomycz MD; Joseph Neimat; Mike Frassica…	Abbott	michael.frassica@abbott.com					N\A
138	Sarah KB Bick MD; Yoaf Kfir; Syd Cash ; Ziv Williams;	Vanderbilt University Medical Center	sarah.bick@vumc.org	1500 21st Ave South	Suite 4340	Department of Neurosurgery	Nashville	TN	US
139	Benjamin Davidson; Peter Giacobbe; Tony George; Clement Hamani MD; Nir Lipsman MD, PhD;		benjaminandrewdavidson@gmail.com	Apt 707	111 Elizabeth St		Toronto	ON	CA
140	Rajiv Sai Dharnipragada; Kellen Mulford; Madelyn Woolums; Andrew W. Grande MD; Donald Nixdorf; Stephen J. Haines MD, FACS; David P Darrow MD MPH;	University of Minnesota	dharn001@umn.edu	Minneapolis		University of Minnesota	Minneapolis	MN	US
141	Tessa Harland MD; Michael Gillogly RN; Taylor Powell; Olga Khazen; Avi A Gajjar; Melisande Nabage; Frank Trujillo; Julie G. Pilitsis MD PhD;	Albany Medical Center	harlant@amc.edu	47 New Scotland Avenue	MC 10	Division of Neurosurgery	Albany	NY	US
142	Matthew Willsey MD; James Michael Mossner MD; Cynthia Chestek; Oren Sagher MD, BA; Parag G. Patil MD PhD;	University of Michigan	mwillsey@umich.edu	1500 E. Medical Center Drive	3470 TC, SPC 5338	Department of Neurosurgery	Ann Arbor	MI	US
143	Rose Caston; Tyler Davis MD PhD; Elliot Smith; John Rolston;	University of Utah MD-PhD Program	rosecaston@gmail.com	126 South 2000 East	Health Science Building, Room 3650		Salt lake City	UT	US
144	Hao Tan; Edward Ward; Ahmed M.T. Raslan MBBS MCh;	Oregon Health & Science University	tanh@ohsu.edu	Portland			Portland	OR	US
145	Phillip Demarest; Eric C. Leuthardt MD; Nabi Rustamov; Peter Brunner; Simon Haroutounian;	Washington University School of Medicine	d.phillip@wustl.edu	Saint Louis			Saint Louis	MO	US
201	Evan Einstein; Ling Pan; Alon Y. Mogilner MD;	NYU Langone Health	eveinstein@gmail.com	One Park Ave	8th Floor		New York	NY	US
202	Vibhor Krishna MD; Francesco Sammartino; Matthew Eames; John W. Snell PhD;	University of North Carolina	Vibhorkrishna@gmail.com	170 Manning Drive	Neurosurgery		Chapel Hill	NC	US
203	Evan M Thomas MD PhD; Erik Middlebrooks; Barton Guthrie; Harrison Walker; John Fiveash MD; Richard Popple PhD; David Standaert; Markus Bredel MD PhD;	Ohio State University	Evan.Thomas@osumc.edu	1733 14th Terrace S			Birmingham	AL	US
204	Raúl Martínez-Fernández; Elena Natera-Villalba; Jorge U. Mañez-Miro; Rafael Rodríguez-Rojas; Marta del Álamo ; Jose A. Pineda-Pardo; Ignacio Obeso; Frida Hernandez-Fernandez; Carmen Gasca-Salas; Michele Matarazzo; Lydia Vela; Fernando Alonso-Frech; Jose Obeso;	HM Centro Integral en Neurociencias AC (CINAC), University Hospital HM Puerta del Sur, CEU San Pablo University	elena.natera.v@gmail.com					N\A
205	Elena Natera-Villalba; Raúl Martínez-Fernández; Rafael Rodríguez-Rojas; Marta del Álamo ; Jose A. Pineda-Pardo; Ignacio Obeso; Frida Hernandez-Fernandez; Carmen Gasca-Salas; Michele Matarazzo; Jose Obeso;	HM Centro Integral en Neurociencias AC (CINAC), University Hospital HM Puerta del Sur, CEU San Pablo University	elena.natera.v@gmail.com					N\A
206	Abhijeet Gummadavelli MD; Robert Sterner; Veronica Chiang MD;	Yale University Neurosurgery	abhijeet.gummadavelli@yale.edu	333 Cedar Street	TMP 431		New Haven	CT	US
207	Matthew Willsey MD; Samuel Nason; Scott Ensel; Hisham Temmar; Joseph Costello; Cynthia Chestek; Parag G. Patil MD PhD;	University of Michigan	mwillsey@umich.edu	1500 E. Medical Center Drive	3470 TC, SPC 5338	Department of Neurosurgery	Ann Arbor	MI	US
208	Sunderland Baker; Andy Tekriwal; Steven Ojemann; Daniel R. Kramer MD; Gidon Felsen PhD; John Thompson PhD; Drew Kern MD MS;	Colorado College	s_baker@coloradocollege.edu	Aurora			Colorado Springs, CO	CO	US
209	Kai Joshua Miller PhD MD PhD; Michael A. Jensen; Dora Hermes; Alexander Belsten; Peter Brunner; Gregory A. Worrell ; Gerwin Schalk;	Mayo Clinic	kjmiller@gmail.com	522 14th Ave SW			Rochester	MN	US
210	Jessica Shields MD, PhD; Alexander Craig McConnell Greven ; Nealen Laxpati MD, PhD; Robert E. Gross MD PhD;	Emory University	Jessica.ann.shields@gmail.com	2020 gravier st	neurosurgery		Atlanta	GA	US
211	Mani Ratnesh Singh Sandhu; Abhijeet Gummadavelli MD; Mark Bower; Jon Zhou; Roni Dhaher; Victoria Phoumthipphavong; Hitten Zaveri; Dennis D. Spencer MD; Tore Eid MD PhD; Jason L. Gerrard MD PhD;	Yale University School of Medicine	maniratnesh.sandhu@yale.edu	100 York St	Apt 14F		New Haven	CT	US
212	Adeel Ilyas MD; Laura Bertran; Stephen Thompson; Nitin Tandon MD FAANS;	University of Alabama Birmingham	adeelilyas@uabmc.edu	707 Richard Arrington Blvd.	Apt. 302		Birmingham	AL	US
213	Mostafa Fatehi Hassanabad MD; Ruchen Guo; Amir Ali Sepehry; Walter Hader;	University of Calgary	fatehi@alumni.ubc.ca	929 W 16th Ave.	302		Vancouver		CA
214	Pranav Nanda MPhil; Zachary Kons; Athar N. Malik MD, PhD; Nathaniel Sisterson; Nora Daly; Vasileios Kokkinos PhD; Robert Mark Richardson MD, PhD;	Massachusetts General Hospital	pnanda@mgh.harvard.edu	Massachusetts General Hospital	55 Fruit Street, WH 502	Department of Neurosurgery	Boston	MA	US
215	Arjun Khanna MD; Pranav Nanda MPhil; Catherine Chu; Sydney Cash ; Vasileios Kokkinos PhD; Robert Mark Richardson MD, PhD;	Massachusetts General Hospital Neurosurgery	akhanna@mgh.harvard.edu	55 Fruit St	White 502		Boston	MA	US
216	Muriel Mardones; Kunal Gupta MD PhD;	Indiana University School of Medicine	dr.k.gupta@gmail.com	355 W 16th St, Ste 5100			Indianapolis	IN	US
217	Nolan James Brown; Ali Reza Tafreshi; Alvin Chan MD; Brian Lien; Elliot Choi; Frank P.K. Hsu MD; Sumeet Vadera MD;	University of California, Irvine School of Medicine	Nolanb@uci.edu	1001 Health Sciences Rd.		University of California, Irvine School of Medicine	Canyon Country	CA	US
218	Jason K Hsieh MD; Francesco Pucci MD; Swetha J Sundar MD; Efstathios Kondylis MD; Akshay Sharma BA; Shehryar R Sheikh AB; Deborah Vegh; Ahsan Moosa Naduvil; Ajay Gupta; Richard Rammo MD; William E. Bingaman MD; Lara Jehi MD;	Cleveland Clinic Foundation	HsiehJ@ccf.org	111 S Peoria St, Unit 705			Chicago	IL	US
219	Nealen Laxpati MD, PhD; Mark Connolly; Alejandra Fernandez; Claire-Anne Gutekunst PhD; Robyn Selawski; Joshua J Chern MD PhD; Annaelle Devergnas PhD; Robert E. Gross MD PhD;	Emory University School of Medicine	nlaxpat@emory.edu	1661 La France Street NE, Unit 412			Atlanta	GA	US
220	Francesco Pucci MD; Kenneth Taylor; Dileep Nair MD;	Cleveland Clinic Foundation	FGPUCCI@GMAIL.COM					N\A
221	Arka Mallela MD, MS; Jorge Alvaro González-Martínez MD, PhD; Hussam Abou-Al-Shaar MD; Michael Maurice McDowell MD; Luke Henry; Alexandra Urban; Joanna Fong-isariyawongse; Niravkumar Barot; James Castellano; Vijayalakshmi Rajasekaran ; Anto Bagic; Carl H. Snyderman MD; Paul A. Gardner MD;	University of Pittsburgh	mallelaan@upmc.edu	200 Lothrop Street	Suite B400		Pittsburgh	PA	US
222	Wendell Bradley Lake MD; Urszula Girska; Aaron Suminski; Elsa Juan; Csaba Kozma; Cynthia Papantonatos; Tom Bugnon; Colin Denis; Vaclav Kremen; Gregory A. Worrell ; Aaron Struck; Lisa Bateman; Edward Merricks; Hal Blumenfeld ; Giulio Tononi; Catherine Schevon ; Melanie Boly;	University of Wisconsin-Madison	lake@neurosurgery.wisc.edu	600 Highland Avenue	K4/8 CSC	Box 8660	Madison	WI	US
223	Jason Aldred; Theresa Zesiewicz; Juan Ramirez-Castaneda; Michael S. Okun MD; Corneliu Luca; Ritesh Ramdhani; Leo Verhagen Metman; Jennifer Durphy; Mustafa Siddiqui; Yarema Basil Bezchlibnyk MD PhD; Jonathan Dennis Carlson MD PhD; Kelly D. Foote MD; Sepehr Sani MD; David Weintraub MD; Jonathan R. Jagid MD; Julie G. Pilitsis MD PhD; Lilly Chen; Roshini Jain;	Boston Scientific	daniel.halperin@bsci.com					N\A
224	Derek Doss; Graham Walter Johnson; Saramati Narasimhan; Jasmine Jiang; Hernan FJ Gonzalez PhD; Danika Lea Paulo MD; Benoit M. Dawant PhD; Catie Chang; Victoria Morgan; Christos Constantinidis; Dario J. Englot MD PhD;	Vanderbilt University	derek.j.doss@vanderbilt.edu	Nashville		Vanderbilt University	Nashville	TN	US
225	Vyshak Chandra MD; Yusuf Mehkri; Anuj Desai; Chadwin Hanna; Jairo Hernandez; Abraham Alvarado-Gonzalez MD; Joshua Wong; Justin D Hilliard MD; Kelly D. Foote MD;	University of Florida	vyshak.chandra@neurosurgery.ufl.edu	PO Box 100265	Department of Neurological Surgery		Gainesville	FL	US
226	Akshay Rao; Charles Lu; Asra Askari; Karlo Malaga; Kelvin Chou; Parag G. Patil MD PhD;	University of Michigan Health System	pgpatil@umich.edu	1500 East Medical Center Drive, SPC 5338	TC 3552/0338, Department of Neurosurgery		Ann Arbor	MI	US
227	Akshay Rao; Aidan Ahamparam; Kelvin Chou; Parag G. Patil MD PhD;	University of Michigan Health System	pgpatil@umich.edu	1500 East Medical Center Drive, SPC 5338	TC 3552/0338, Department of Neurosurgery		Ann Arbor	MI	US
228	Aislyn DiRisio BS; Josue Moises Avecillas-Chasin MD PhD; Samantha Platt; Martijn Figee; Joohi Jimenez-Shahed ; Helen S. Mayberg MD; Ki Sueng Choi; Brian H. Kopell MD;	Icahn School of Medicine at Mount Sinai	aislyn.dirisio@gmail.com	75 Francis St			Boston	MA	US
229	Saswat Sahoo; Mihika Thapliyal; Francesco Pucci MD; Hongchae Baek; Emmanuel Obusez; Daniel Lockwood; Stephen Jones; Sean Nagel;	Cleveland Clinic Lerner College of Medicine	sahoos2@ccf.org	Cleveland			Cleveland	OH	US
230	Samuel Nason; Matthew Mender; Eric Kennedy; Joris Lambrecht; Kevin Kilgore; Srinivas Chiravuri; Nishant Ganesh Kumar; Theodore Kung; Matthew Willsey MD; Cynthia Chestek; Parag G. Patil MD PhD;	University of Michigan	samnason@umich.edu	Ann Arbor			Ann Arbor	MI	US
231	Alaa Taha; Greydon Gilmore; Ali Khan; Jonathan C Lau MD, PhD;	University of Western Ontario	ataha24@uwo.ca					N\A
232	Tamara Stiep; adolfo ramirez-zamora; Alexander Tröster; Roshini Jain; Lilly Chen; Mahsa Malekmohammadi; Michael S. Okun MD;	Boston Scientific	daniel.halperin@bsci.com					N\A
233	Alexander Alley; Joseph Neimat; Scott Wylie; Robert Underwood; Nelleke van Wouwe;	University of Louisville	alexanderalley@upike.edu					N\A
234	Sydnei Lewis; Lisa Hirt; Michelle Case; Christopher Pulliam; James Eubanks; Steve Goetz; Robert Raike; Steven Ojemann; Daniel R. Kramer MD; Drew Kern; John Thompson PhD;	University of Colorado Boulder	syle4354@colorado.edu					N\A
235	Josue Moises Avecillas-Chasin MD PhD; Christopher Honey MD PhD; Manraj S. Heran MD; Marie Krüger;	University of Nebraska Medical Center	javecillaschasin@unmc.edu	1562 Waller Street			Omaha	NE	US
236	Danika Lea Paulo MD; Saramati Narasimhan; Hernan FJ Gonzalez PhD; Jackson Allen; Rui Li; William Rodriguez MEd; Peter Konrad MD PhD; Joseph Samir Neimat MD MS; Hamid M. Shah MD, FAANS; Sarah KB Bick MD; Benoit Dawant; Dario J. Englot MD PhD;	Vanderbilt University Medical Center	danika.l.paulo@vumc.org	1161 21st Avenue South	T4224 Medical Center North	Department of Neurosurgery	Nashville	TN	US
237	Hamid M. Shah MD, FAANS; Peter Konrad MD PhD;	Vanderbilt University Medical Center	hshah4273@gmail.com	1684 Westover Lane			Chattanooga	TN	US
238	Neil Rasiah; Romir Maheshwary ; Churl-Su Kwon MD MPH; Joshua Bloomstein; Fady M. Girgis BSc Pharm MD EdM FRCSC;	Cumming School of Medicine, University of Calgary	neilen.rasiah@ucalgary.ca					N\A
239	Jacob Hanson; Alec Jonason ; James Jean; Robert Allen McGovern MD;	University of Minnesota Department of Neurosurgery	Jacob.Hanson@co.rvu.edu	20250 E Red Fox Ln			Centennial	CO	US
240	John James Pearce MD; Sepehr Sani;	Rush University Medical Center	pearcejohnj@gmail.com	474 N Lakeshore Dr., Apt 4709	Apt 4709		Philadelphia	PA	US
241	Jan Vesper MD; Roshini Jain; Heleen Scholtes; Alex Wang MS; Michael T Barbe ; Steffen Paschen MD; Andrea Kühn MD; Jens Volkmann; Chong Sik Lee; Günther Deuschl MD;	Boston Scientific	daniel.halperin@bsci.com					N\A
242	julien engelhardt; emmanuel cuny; Nejib Zemzemi; Dominique Guehl; Nathalie Damon-Perriere; Pierre Burbaud;		emmanuel.cuny@chu-bordeaux.fr					N\A
243	Nicholas James Brandmeir MD MS; Vishal Thakur; Muhammad Babar Khan MD;	WVU Dept of Neurosurgery	nbrandmeir@gmail.com	Morgantown			Morgantown	WV	US
244	Enrico Opri; Faical Isbaine PhD; Nicholas Au Yong MD PhD; Jon Timothy Willie MD PhD; Nicholas M. Boulis MD; Thomas Wichmann; Robert E. Gross MD PhD; Svjetlana Miocinovic;	Emory University School of Medicine	enrico.opri@emory.edu					N\A
245	Hailey Budnick MD; Kunal Gupta MD PhD;	Indiana University School of Medicine	hbudnick@iu.edu	355 W. 16th Street, Suite 5100	Goodman Campbell Brain & Spine, Department of Neurosurgery		Indianapolis	IN	US
246	Henry M Skelton; Dayton Grogan; Nealen Laxpati MD, PhD; Robert E. Gross MD PhD; Nicholas Au Yong MD PhD; Svjetlana Miocinovic;	Emory University/Georgia Institute of Technology/Morehouse School of Medicine	henry.m.skelton@gmail.com	1355 E Rock Springs RD NE			Atlanta	GA	US
247	Kuang-Hsuan Chen; Austin M. Tang BS MPH; Zachary Gilbert; Roberto Martin del Campo-Vera PhD; Rinu Sebastian ; Arthur Shao; Emiliano Tabarsi; Ryan Chung; Shivani Sundaram; Alexandra Kammen MD; Jonathon Cavaleri MD; Angad S. Gogia BS; Xenos Mason; Christi Heck; George Nune; Charles Y. Liu MD, PhD; Spencer Kellis; Brian Lee MD PhD;	Keck School of Medicine of USC	zgilbert@usc.edu	Los Angeles			Los Angeles	CA	US
248	Zachary Gilbert; Ryan Chung; Kuang-Hsuan Chen; Austin M. Tang BS MPH; Emiliano Tabarsi; Shivani Sundaram; Roberto Martin del Campo-Vera PhD; Arthur Shao; Rinu Sebastian ; Alexandra Kammen MD; Jonathon Cavaleri MD; Angad S. Gogia BS; Xenos Mason; Christi Heck; George Nune; Charles Y. Liu MD, PhD; Spencer Kellis; Brian Lee MD PhD;	Keck School of Medicine of USC	zgilbert@usc.edu	Los Angeles			Los Angeles	CA	US
249	Mohamad Abbass; Renee Johnston; Benjamin Corrigan; Roberto Gulli; Adam J. Sachs MD; Jonathan C Lau MD, PhD; Julio Martinez-Trujillo;	University of Western Ontario	mabbass2018@meds.uwo.ca	London			London	ON	CA
250	Zachary Gilbert; Roberto Martin del Campo-Vera PhD; Austin M. Tang BS MPH; Kuang-Hsuan Chen; Rinu Sebastian ; Arthur Shao; Emiliano Tabarsi; Ryan Chung; Shivani Sundaram; Alexandra Kammen MD; Jonathon Cavaleri MD; Angad S. Gogia BS; Xenos Mason; Christi Heck; George Nune; Charles Y. Liu MD, PhD; Spencer Kellis; Brian Lee MD PhD;	Keck School of Medicine of USC	zgilbert@usc.edu	Los Angeles			Los Angeles	CA	US
251	James Trevathan; Kevin Cheng; Brandon Coventry; Hyun-Joo Park; Wendell Bradley Lake MD; Kip Ludwig, Ph.D; Erika Ross; Aaron J Suminski PhD;	University of Wisconsin-Madison	asuminski@wisc.edu						US
252	Anand Tekriwal BA; Gidon Felsen PhD; Steven Ojemann MD; Aviva Abosch MD PhD; John Thompson PhD;	University of Colorado Anschutz School of Medicine	anand.tekriwal@ucdenver.edu	3040 Zuni Street	Unit F		Denver	CO	US
253	Roberto Martin del Campo-Vera PhD; Zachary Gilbert; Austin M. Tang BS MPH; Jonathon Cavaleri MD; Arthur Shao; Kuang-Hsuan Chen; Rinu Sebastian ; Emiliano Tabarsi; Ryan Chung; Shivani Sundaram; Alexandra Kammen MD; Angad S. Gogia BS; Xenos Mason; Christi Heck; George Nune; Charles Y. Liu MD, PhD; Spencer Kellis; Brian Lee MD PhD;	Keck School of Medicine of USC	zgilbert@usc.edu	Los Angeles			Los Angeles	CA	US
254	Eric Cole; Lou T Blanpain; Nealen Laxpati MD, PhD; Robert E. Gross MD PhD;	Emory University School of Medicine	ercole@emory.edu	Atlanta			Atlanta	GA	US
255	Helen Qian; Danika Lea Paulo MD; Deeptha Subramanian; Kaltra Dhima; Sarah KB Bick MD;	Vanderbilt University	helen.qian@vanderbilt.edu	18413 Polynesian Lane			Boyds	MD	US
256	Clayton Bingham; Cameron C. McIntyre PhD;	Duke University	cameron.mcintyre@duke.edu	Case Western Reserve University	10900 Euclid Avenue		Durham	NC	US
257	Jay Gill; Mahmoud Omidbeigi; Nanthia Suthana; Ausaf A Bari AB MA MD PhD;	University of California, Los Angeles	jlgill@mednet.ucla.edu	Los Angeles			Los Angeles	CA	US
258	Jordan Christopher Iordanou MD, PhD; Jennifer Schreiber; Shih-Yen Tsai; Son Ton; Akram Imam; Brian Powers; James Walter; Martin Oudega; Gwendolyn Kartje; Russ P. Nockels MD, FAANS;	Loyola University Medical Center	jordan.iordanou@lumc.edu	1214 Forest Rd			Lagrange Park	IL	US
259	MARKUS ADAMEK; Jon Timothy Willie MD PhD; James Swift; Lawrence Eisenman; John Zempel; Cory Inman; Peter Brunner;	Washington University in St. Louis	adamek.m@wustl.edu	St. Louis			St. Louis	MO	US
262	Konstantin V. Slavin MD; Marc Huntoon; Jonathan Hagedorn; Nate Crosby PhD; Joseph Boggs PhD;	SPR Therapeutics	ncrosby@sprtherapeutics.com	308 West Rosemary St	Suite 201		Chapel Hill	NC	US
263	Kunal Gupta MD PhD;	Indiana University School of Medicine	dr.k.gupta@gmail.com	355 W 16th St, Ste 5100			Indianapolis	IN	US
264	Josue Moises Avecillas-Chasin MD PhD; Ki Sueng Choi; Andrew H. Smith; Helen S. Mayberg MD; Cristina Nombela; Bryan Strange; Juan Antonio Barcia Albacar; Martijn Figee; Brian H. Kopell MD;	University of Nebraska Medical Center	javecillaschasin@unmc.edu	1562 Waller Street			Omaha	NE	US
265	Jon Timothy Willie MD PhD; Daniel Drane PhD; Kelly R Bijanki PhD; Jennifer Stevens; Sean Minton; Abigail Powers; Tanja Jovanovic; Sanne van Rooij;	Washington University in St. Louis	jontwillie@wustl.edu	660 S. Euclid Avenue	Department of Neurosurgery		St Louis	MO	US
266	John Myers; Jiayang Xiao; Brian Metzger; Joshua Adkinson; Anusha Allawala; Victoria Pirtle ; Raissa Mathura; Adrish Anand; Ron Gadot ; Ricardo Andres Najera; Hernan Gonzalo Rey; Wayne Goodman; Sanjay Mathew ; Nader Pouratian MD PhD; Kelly R Bijanki PhD; Sameer A. Sheth MD PhD;		john.myers@bcm.edu	Houston			Houston	TX	US
267	Anusha Allawala; Joshua Adkinson; Denise Oswalt; Raissa Mathura; Wayne Goodman; Nader Pouratian MD PhD; Kelly R Bijanki PhD; David Borton; Sameer A. Sheth MD PhD;	Brown University	anusha_allawala@brown.edu	Providence			Providence	RI	US
268	Wooseong Choi; Kofi Agyeman; Lindsey Crown; Naim Lazkani; Isabella Hoang; Nancy Zepeda; Charles Y. Liu; Vasileios Christopoulos; Darrin J. Lee MD PhD;	University of Southern California	wooseong@usc.edu	Los Angeles		University of Southern California	Los Angeles	CA	US
270	Ki Sueng Choi; Juna Khang; Andreas Horn; Patricio Riva Posse MD; Helen S. Mayberg MD;	Ichan School of Medicine at Mount Sinai	Kisueng.choi@mssm.edu	New York			New York	NY	US
271	Zahraa Fadhil Al-Sharshahi ; Lea Tortolero; Asam Saad; James Young; Lara Marcuse; Lizbeth Nunez Martinez ; Ignacio Saez; Fedor Panov MD;	Icahn School of Medicine at Mount Sinai	zahraaalsharshahi@rcsi.com	515 West 59th Street	32F		NEW YORK	NY	US
272	Brian Metzger; Prathik Kalva; Madaline Mocchi; Brian Cui; Joshua Adkinson; Zhengjia Wang; Raissa Mathura; Adrish Anand; Ben Shofty MD; Sameer A. Sheth MD PhD; Kelly R Bijanki PhD;	Baylor College of Medicine	bmetzger@bcm.edu	Houston			Houston	TX	US
273	Ben Shofty MD; Ron Gadot ; Ashwin Viswanathan MD; Nicole Provenza; Eric Storch; Greg Vogt; Matthew Meyers; Michelle Avendano-Ortega; Wayne Goodman; Sameer A. Sheth MD PhD;	Baylor College of Medicine	shoftyben@gmail.com	175 N Medical Dr. E 5th floor			Salt Lake City	UT	US
274	Lea Tortolero; Zahraa Fadhil Al-Sharshahi ; Asam Saad; James Young; Lara Marcuse; Lizbeth Nunez Martinez ; Faris Gulamali; Ignacio Saez; Fedor Panov MD;	Icahn Medical School at Mount Sinai	leatortolero@gmail.com	New York			New York	NY	US
275	Khashayar Mozaffari; Katherine Hofmann; Eric Chalif; Paul B Boyd; Archana Pasupuleti; William Gaillard ; Chima Oluigbo MD;	Children's National Medical Center	pboyd@gwu.edu	2300 Eye St NW		George Washington University School of Medicine	Washington	DC	US
276	Martina Mustroph MD/PhD; Patrick Ng; Yoav Kfir; Ziv Williams MD;	Brigham and Women's Hospital	mmustroph@bwh.harvard.edu					N\A
277	Adeel Ilyas MD; Laura Bertran; Stephen Thompson; Nitin Tandon MD FAANS;	University of Alabama Birmingham	adeelilyas@uabmc.edu	707 Richard Arrington Blvd.	Apt. 302		Birmingham	AL	US
278	Hernan FJ Gonzalez PhD; Tyler Joseph Ball MD; Niyatee Samudra; Eric Armour; Danika Lea Paulo MD; Saramati Narasimhan; Bassel Abou-Khalil; Kevin Haas; Sarah KB Bick MD; Dario J. Englot MD PhD;	Vanderbilt University	hfjgonzalez@gmail.com	2007 Natchez Trace	Address	Vanderbilt University	Nashville	TN	US
279	Jonathan C Lau MD, PhD; Dayton Grogan; Pia Mendoza; Neal Laxpati; Daniel Drane PhD; Matthew Schniederjan; KATIE Bullinger; Jon Timothy Willie MD PhD; Robert E. Gross MD PhD;	University of Western Ontario	jonathan.c.lau@gmail.com	49 Murdock Street	Upper		London	ON	CA
280	Islam Fayed MD; Armin Mortazavi; Alexander Ksendzovsky MD; Marcelle Altshuler BS; Kareem A. Zaghloul MD PhD; Dragan Maric;	National Institute of Health	am3591@georgetown.edu	Ann Arbor			Bethesda	MD	US
281	Andrew Willett; Meena Vessell MD; Joseph Neimat; Brittany Chapman ;	Department of Neurosurgery, University of Louisville	acwill25@louisville.edu					N\A
282	Mihika Thapliyal; Saswat Sahoo; Francesco Pucci MD; Hongchae Baek; Emmanuel Obusez; Daniel Lockwood; Stephen Jones; Sean Nagel;	Cleveland Clinic Lerner College of Medicine	mxt392@case.edu	9501 Euclid Ave			Cleveland	OH	US
283	Mohamad Abbass; Greydon Gilmore; Alan Chalil MD; Brendan Santyr; Andrew Parrent ; Keith MacDougall MD; Jonathan C Lau MD, PhD;	University of Western Ontario	mabbass2018@meds.uwo.ca	London			London	ON	CA
284	Christopher miller MD; Jennifer Muller ; Angela Noecker; Caio M Matias MD PhD; Cameron C. McIntyre PhD; Chengyuan Wu MD MSBmE;	Thomas Jefferson University	Cpkmillermd@gmail.com	5644 Walmer St			Kansas City	KS	US
285	Shaquia Idlett-Ali; Rex Tien; Marielle Darwin; John Thompson PhD; Daniel R. Kramer MD;	University of Colorado Anschutz Medical Campus	shaquia.idlett-ali@cuanschutz.edu	13001 East 17th Place			Aurora	CO	US
286	Rex Tien; Jonathan Platt; Madelyn Mendlen; Linea Gutierrez; Drew Kern MD MS; Steven Ojemann MD; John Thompson PhD; Daniel R. Kramer MD;	University of Colorado Anschutz Medical Campus	rex.tien@cuanschutz.edu	Aurora			Aurora	CO	US
287	Asra Askari ; Brandon Zhu; Kelvin Chou; Parag G. Patil MD PhD;	University of Michigan	asraa.asgari@gmail.com	614 MINER ST			ANN ARBOR	MI	US
288	Wooseong Choi; Kaevon Brasfield; Kevin Wu; Jonathan Cavaleri; Robert G. Briggs MD; Melanie Cohn; Brian Lee MD PhD; Xenos Mason; Darrin J. Lee MD PhD;	Keck School of Medicine of USC	wooseong@usc.edu	Los Angeles		University of Southern California	Los Angeles	CA	US
289	Jordan Lam MBBS BSc; Asra Askari ; Taylor Greif; Xiru Lyu; amanda maher; carol persad; Kelvin Chou; Parag G. Patil MD PhD;	University of Michigan	lamjor@med.umich.edu	1500 E Medical Center Drive	3552 TC, SPC 5338		Ann Arbor	MI	US
290	Jan Vesper MD; Roshini Jain; Heleen Scholtes; Alex Wang MS; Michael T Barbe ; Steffen Paschen MD; Andrea Kühn MD; Jens Volkmann; Chong Sik Lee; Günther Deuschl MD;	Boston Scientific	daniel.halperin@bsci.com					N\A
291	Daniel Zhang; John James Pearce MD; Edgar Petrosyan; Alireza Borghei; Sepehr Sani;	Rush University Medical Center	daniel_y_zhang@rush.edu	Chicago			Chicago	IL	US
292	Zachary Kons; Amir Hadanny MD; Alan Bush; Pranav Nanda MD; Varun Saravanan; Todd Herrington ; Robert Mark Richardson MD, PhD;	Massachusetts General Hospital	konsza@vcu.edu	1914 East Franklin Street	Apartment 315		RICHMOND	VA	US
293	Patrick Ng; Alfredo Morales Pinzon; Fardad Behzadi; Michele Cavallari; Andrzej Marciniak; Grégory Bliault; Kezia Irene; David J Segar MD; Matthew N. DeSalvo; Jason White; Nathan McDannold; Charles R.G. Guttmann; G. Rees "Rees" Cosgrove MD, FRCS(C), FAANS;	Harvard Medical School	patrickrayng@gmail.com	25 Shattuck St.		Harvard Medical School	Boston	MA	US
295	Graham Winston BA; Sara Strauss; Kristen Leeman; Arindaram RoyChoudhury; Charlene Thomas; Levi Chazen; Michael Gordon Kaplitt MD, PhD;	Weill Cornell Medicine	gmw2002@nyp.org	520 e 68th street			New York City	NY	US
